# Supplementary material for: Analysis on the Influencing Factors of Driving Behaviours Based on Theory of Planned Behaviour
Source: Hindawi journal article supplement (doi:10.1155/2021/6687674), 2021-01-01
Supplement: f1 [file 6687674.f1.docx]

**Chinese driving behaviour questionnaire**

**L1:** You have already been on the way to find out that your vehicle has traffic restrictions based on the last digit of license plate numbers.

**L2:** When turning to the right , you never observe the mirror on the left.

**L3:** You don't care whether the water splashes on the pedestrians when driving over the waterlogged road.

**L4:** When driving , you are used to following the instructions of mobile navigation software(APP) completely . However , you drive the wrong way because the mobile navigation software provide the error planning.

**L5:** When waiting and stopping temporarily at the side of the road , you step on the brake , meanwhile , the vehicle is still in forward gear(D gear or S gear) . But the vehicle suddenly moving forward because you release brake pedal with your distraction.

**L6:** You forgot to fasten your seat belt , and wore it while driving until the vehicle started to prompt you****** .

**L7:** Your vehicle warning indicator lights up , but you never know what it means****** .

**L8:** When you check your speedometer , you find that you have been speeding unconsciously .

**L9:** You was lost in thought or lacking in concentration while driving , and passed directly without giving precedence to pedestrian out of courtesy because you didn't notice that someone was waiting to cross the road .

**L10:** With distraction or inattention driving , you are dully realize that the vehicle in front has slowed down , and must press the brake pedal hard to avoid collision***** .

**L11:** It was intended to turn on the windscreen wiper, but the turn signal or other functions were turned on by mistake and vice versa***** .

**L12:** When driving , you miss the exit you should have born out and have to make a detour at the next exit****** .

**L13:** You didn’t merge in advance when you was driving . When you wanted to change lanes at the intersection , you had already reached the solid line that you can’t change the lane . And you have to make a detour or merge the road at the dotted line in the next road section****** .

**L14:** You had intended to turn around or make a turn at the intersection , but it’s difficult to change lanes in time because of occupying the wrong lane or traffic jam . And you have to drive to next intersection or a further distance to your destination****** .

**L15:** Attempting to overtake without checking the rear-vision mirror , but you are alerted by the overtaking vehicles in the rear via horning or blinking the high beam .

**L16:** You forgot to switch your lights from high beam to low beam , until you were reminded by the other drivers via horning or blinking the high beam .

**L17:** When turning left or right , you didn’t notice the person , bicycle or motor because your vision was obscured by A-pillar(pillars on both sides of windshield) .

**L18:** You didn't notice someone coming out from behind the parked car in front , and you had to emergency brake or aviod urgently****** .

**M1:** Misunderstanding the meaning of traffic signs and driving the vehicle to the prohibited lane .

**M2:** When turning from the main road into the path , you did not notice the pedestrian crossing the road***** .

**M3:** When changing lanes to the left onto a main road , you suddenly found that a vehicle had not been noticed was approaching***** .

**M4:** The vehicle is still moving forward , when someone or something external catches your eyes***** .

**M5:** You wanted to make a U-turn to the opposite lane , but you drove a certain distance and didn’t find the dotted lane , so you had to bite the bullet and make a U-turn on the solid line****** .

**M6:** You misjudged the vehicle distance in the parking lot , and almost (or already) hit the adjacent vehicle***** .

**M7:** Overtaking more than a row of stationary or slow-moving vehicles , but you found that they were waiting in line to pass , and you had to force a line .

**M8:**When driving out of the roundabout , you chose the lane exit by mistake , so you had to go around and reselect the lane exit****** .

**M9:** You misjudged the gap that the vehicle can pass when turning right , and hit the parked car, guardrail or roadside****** .

**E1:** Suddenly exit the vehicle at the intersection ahead , you will first quickly observe whether there is a vehicle coming from behind , then brake urgently and change lanes to avoid collision with the vehicle in front******.

**E2:** Suddenly exit the vehicle at the intersection ahead , you will brake hard without changing lanes, even if you collide with the car in front******.

**E3:** In the two-way single lane , you find that the team in front is driving slowly or parking , for the sake of prudent consideration , you will not overtake , but continue to follow the team behind****** .

**D1:** If the behavior of other drivers angers you , you will cut off to get back at him****** .

**D2:** There are pedestrians crossing the road at the intersection, even if there is a long distance, you will still slow down and let the pedestrian pass first****** .

**D3:** For the sake of preventing pedestrians from hitting the roadside , when driving in a narrow two-lane, you will control the vehcile between the two lanes——in the middle of the road .

**D4:** Sometimes , you lose patience with a driver who is driving slow , and overtake at the risk of breaking the rules***** .

**D5:** When waiting for the red light to turn green, in order to be ahead of other vehicles , you step on the accelerator madly like a racing car*** .**

**D6:** Passengers will remind you to calm down , drive slowly or pay attention to safety*** .**

**D7:** When driving , your vehcile has a certain short distance from the car in front , and you will use the high beam to blink the car in front aiming driver to drive faster or make way for you***** .

**D8:** When driving at night , you feel that the vehicle in front of you is slow , so you will overtake after shaking it with the high beam several times****** .

**D9:** In order not to wait for the red light , you accelerate through the intersection when the signal light has turned yellow******.

**D10:** In recent years , China’s traffic management department has increased punishment for “disrespectful pedestrians” , and you think it is necessary and agree with it****** .

**D11:** You are irritated by the behavior of other drivers , in order to give him a lesson , you chase him and interfere with his normal driving route***** .

**D12:** When the traffic is not busy in the early morning or evening , in order to reach the destination as soon as possible or satisfy the driving experience , you will exceed the speed limit deliberately***** .

**D13:** You resent a certain type of road user (eg. Pedestrian ,Vehcile etc.) and show your hostility as much as possible(eg. Horning , Cutting off etc. ) ***** .

**D14:** On the multiple lanes , you will continuously overtake on the left and right when traffic jams or traffic flow is slow .

**D15:** When a two-wheel vehicle (such as take out) that is rushed through or driven aggressively interferes with your route , you will take retaliatory measures , such as whistling , squeezing it , blinking high beams , etc****** .

**D16:** There are pedestrians or bicycles crossing the road when you drive at a fast speed , and you will drive past them without slowing down****** .

**D17:** There are pedestrians or bicycles moving slowly on the road when you are driving , you will be impatient and angry to whistle and urge them to make way for you******.

**D18:** In order to shorten your journey , you ignored the one-way sign beside the road and drove into the one-way lane in the opposite direction****** .

**R1:** You will occupy the opposite lane when there are vehicles in front of you to stop and block the road . After overtaking , you will return to the original lane and move on .

**R2:** When reversing , you hit something you didn't notice in advance***** .

**R3:** You think traffic regulations are not just "recommendations" , we need to fully comply .

**R4:** You don’t want to wear your seat belt and never want the vehicle to remind you , so you use the “seat belt insert” or insert the co-pilot ’s seat belt in your seat belt socket****** .

**H1:** Before you drive an unfamiliar car , you will deliberately familiarize yourself with the braking distance, braking sensitivity , vehicle margins and other information****** .

**H2:** Before you drive an unfamiliar car , you will adjust the position of the seat and the angle of the rearview mirror to ensure that it suits your driving habits****** .

**H3:** You can't make good use of the rearview mirror , so that you often hit things when reversing .

**H4:** When driving , you will not send text messages via WeChat or shortmessage****** .

**H5:** When driving , you will not use mobile phone call or WeChat for voice chat****** .

**H6:** You often hold the steering wheel with only one hand****** .

**H7:** As long as you drive , no matter how far away you are or whether there is monitoring , you will wear your seat belt completely******.

**H8:** When you change the lane , you will habitually observe the rearview mirror on the corresponding side in time****** .

**H9:** When you drive to the intersection , you will quickly look around to see if there are cars, pedestrians, or other obstacles****** .

**H10:** When driving straight , you often pay attention to the rear mirror in the middle attend the dynamics of the vehicles behind you****** .

**H11:** Whenever there are pedestrians around your vehcile while driving , you will be cautious and keep a low speed and as far as possible away from the pedestrians****** .

**P1:** You will be nervous while driving , especially if there are other family members or friends in your driving vehcile****** .

**P2:** In your opinion , the functions of ADAS (such as lane departure warning , driving fatigue monitoring , etc.) are necessary .

**P3:** If other drivers offend you with impolite driving behavior , you will ignore it for safety***** .

**P4:** After you actually drive yourself , you realize that the drivers on the road did not all have skillful driving skills , which caused you to try to keep away from the car while being a pedestrian****** .

**P5:** When you are irritated by the behavior of other drivers , you will deliberately collide with each other on the premise that you are not responsible for it******.

* DBQ from James Reason (1990).

*R Revision of the items from James Reason’s DBQ (1990).

**Items from CDQ (Xie et al. 2002).

**R Revision of the items from CDQ (Xie et al. 2002).
